# Supplementary material
Source: MDPI journal article supplement (https://www.mdpi.com/2071-1050/15/9/7092)
Supplement: s1 [file s1 › sustainability-2304685-supplementary.pdf]

# Supporting Information

## Ultrathin TiO<sub>2</sub> Blocking Layers via Atomic Layer Deposition toward High-Performance Dye-Sensitized Photo-Electrosynthesis Cells

Xiaodan Zhang <sup>1,2</sup>, Lei Lei <sup>2</sup>, Xinpeng Wang<sup>1,\*</sup> and Degao Wang<sup>2,\*</sup>

<sup>1</sup> State Key Laboratory of Featured Metal Materials and Life-cycle Safety for Composite Structures, School of Resources, Environment and Materials, Guangxi University, Nanning 530004, P.R. China

<sup>2</sup> Engineering Laboratory of Advanced Energy Materials, Ningbo Institute of Materials Technology and Engineering Chinese Academy of Sciences, Ningbo 315201, P.R. China

\* Correspondence: wangxinpeng@gxu.edu.cn and wangdegao@nimte.ac.cn

### Supplementary results

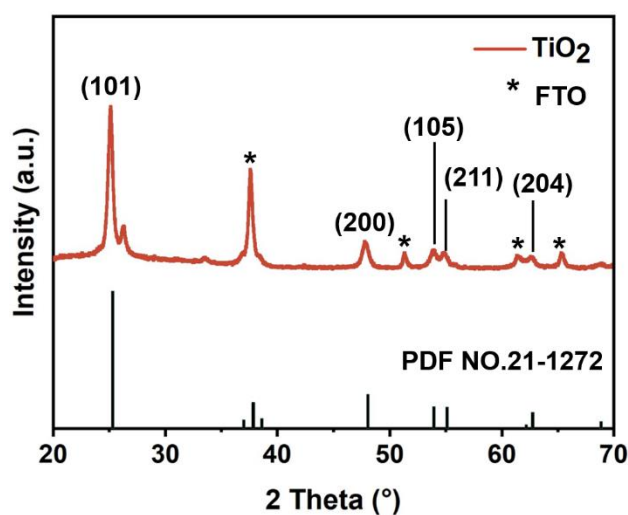

**Figure S1.** X-ray diffraction pattern of TiO<sub>2</sub>.

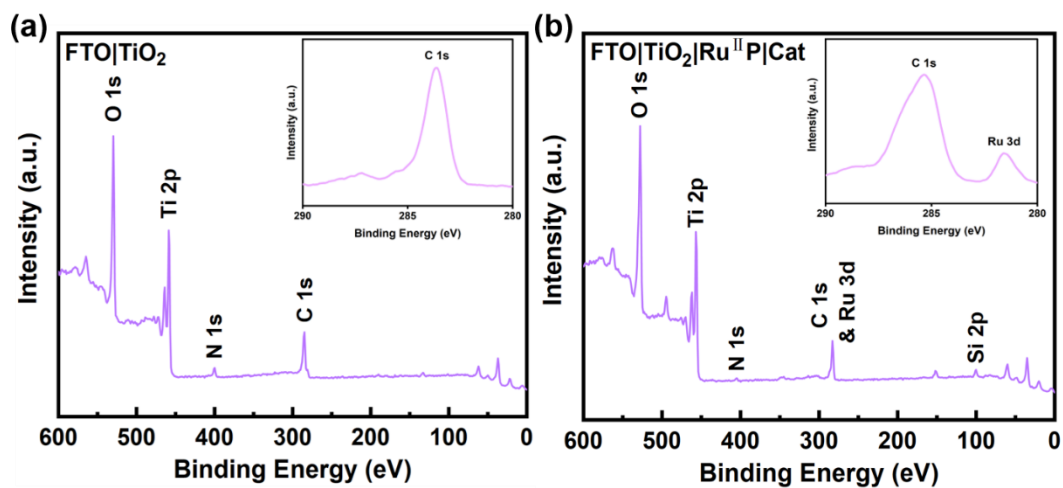

**Figure S2.** XPS spectra of (a) FTO| TiO<sub>2</sub> and (b) FTO| TiO<sub>2</sub>| Ru<sup>II</sup>P| Cat. Inset is (a) the region of C 1s and (b) the region of C 1s & Ru 3d.

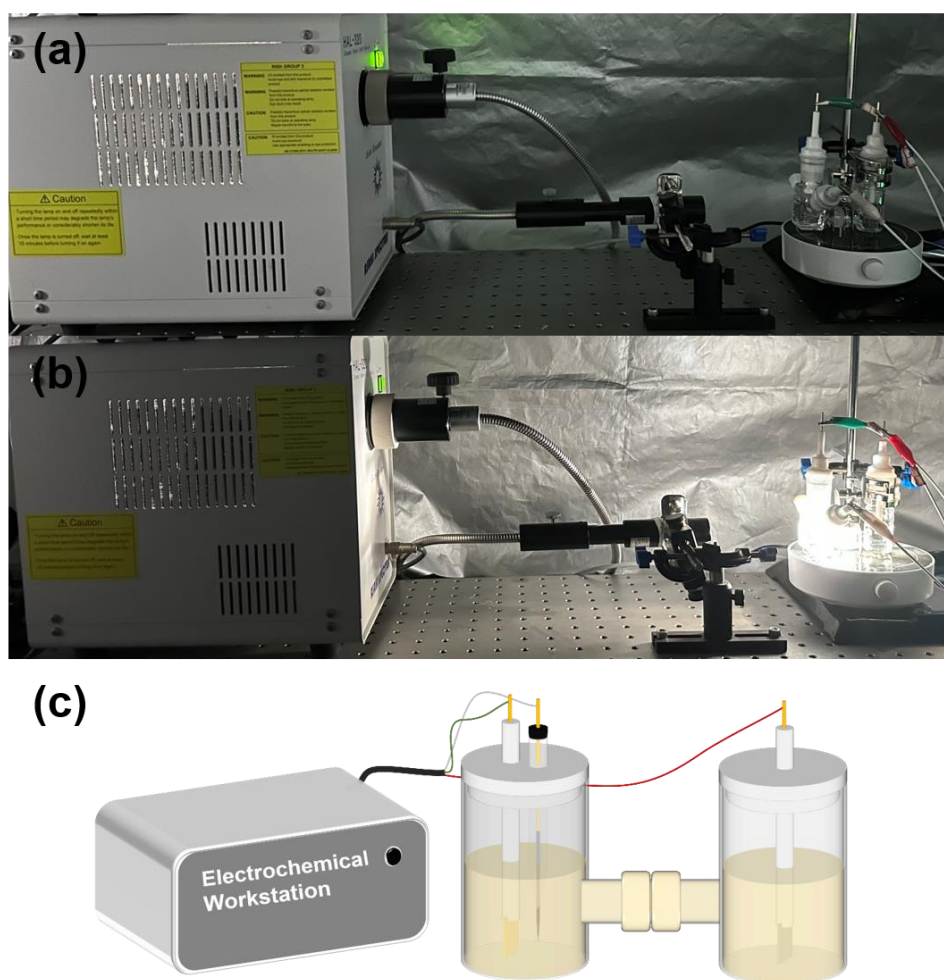

**Figure S3.** (a) Experimental physical picture under dark conditions, (b) Experimental physical picture under light irradiation and (c) The diagram of experimental setup.

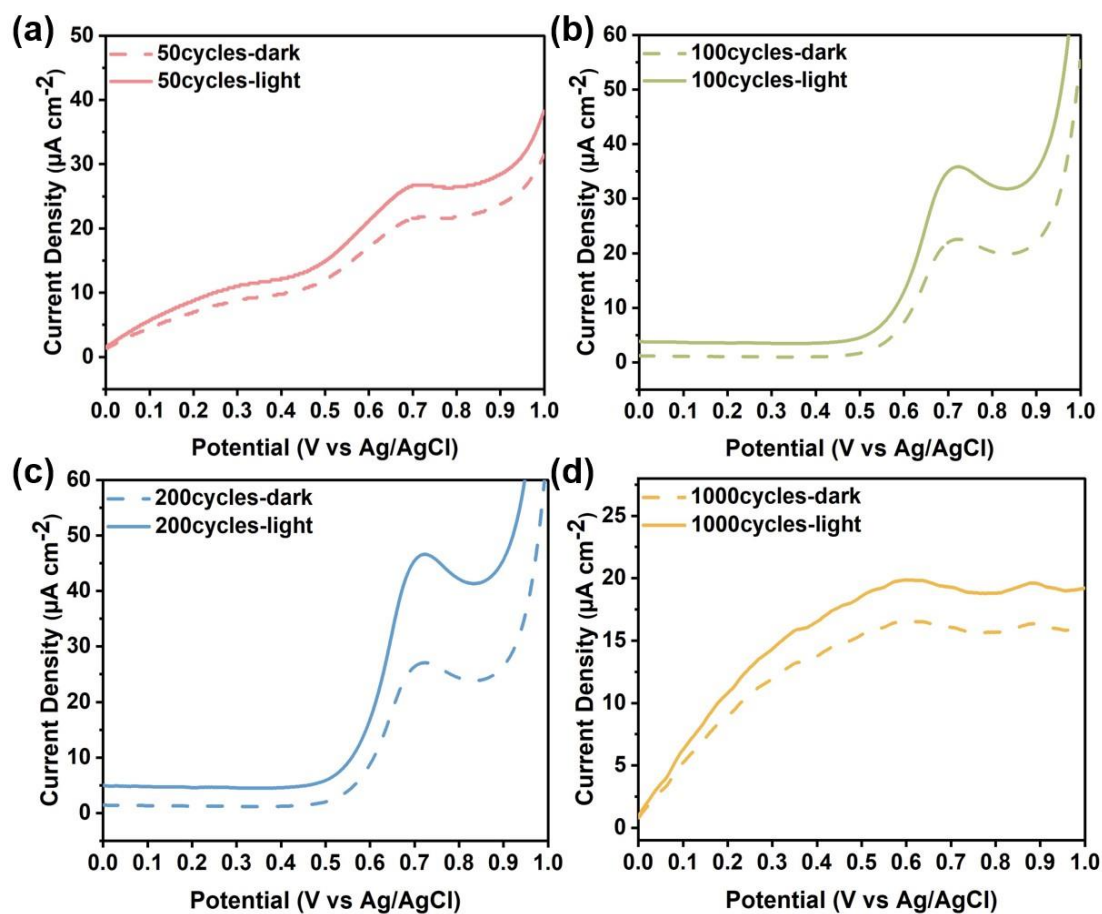

**Figure S4.** LSV for electrodes with 50(a), 100(b), 200(c) and 1000(d) cycles of BL under dark and irradiation conditions,  $v = 50 \text{ mV s}^{-1}$ .

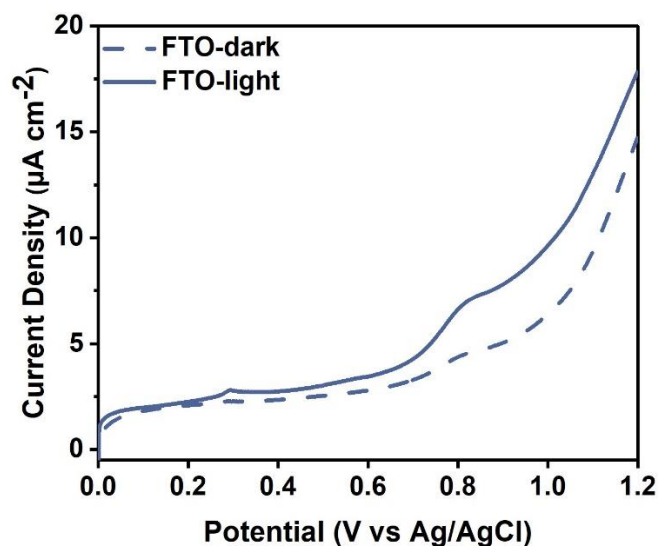

**Figure S5.** Linear sweep voltammograms for FTO under dark and irradiation conditions.

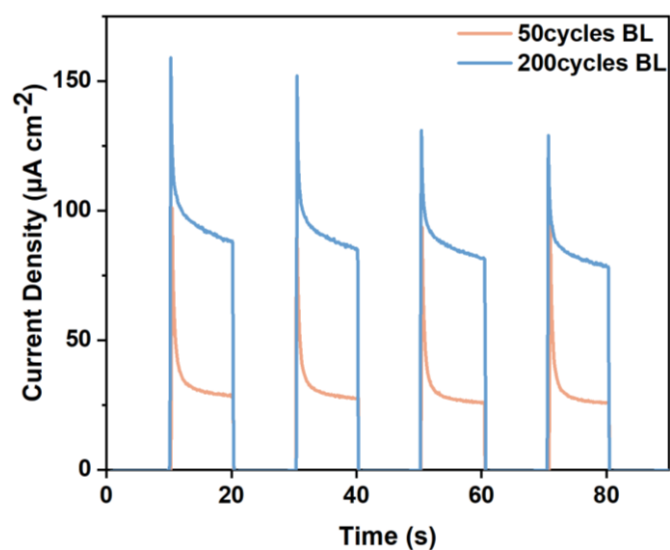

**Figure S6.** Chronoamperometry of the photocurrent over 90 s dark–light cycles for water oxidation by FTO|TiO<sub>2</sub>|Ru<sup>II</sup>P|Cat of 50 cycles BLs (pink) and FTO|TiO<sub>2</sub>|Ru<sup>II</sup>P|Cat of 200 cycles BLs (blue).

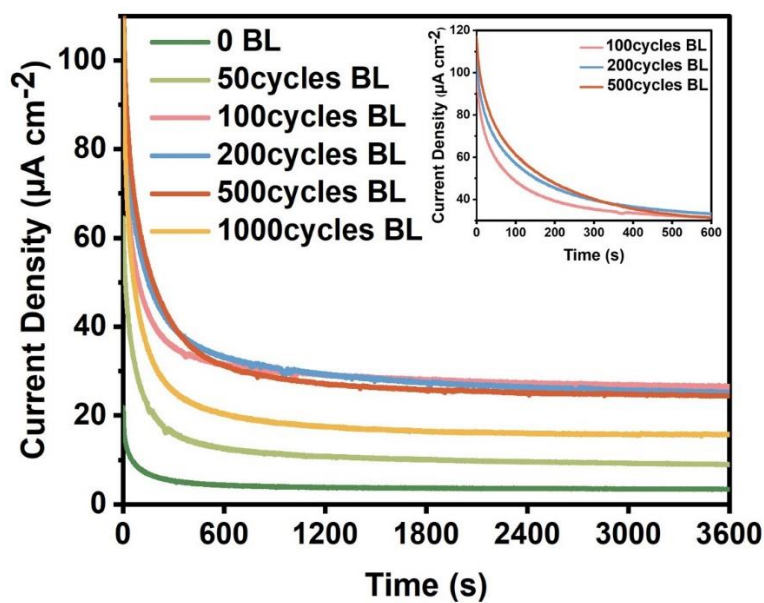

**Figure S7.** Stability curve of the electrodes within one hour under light illumination.

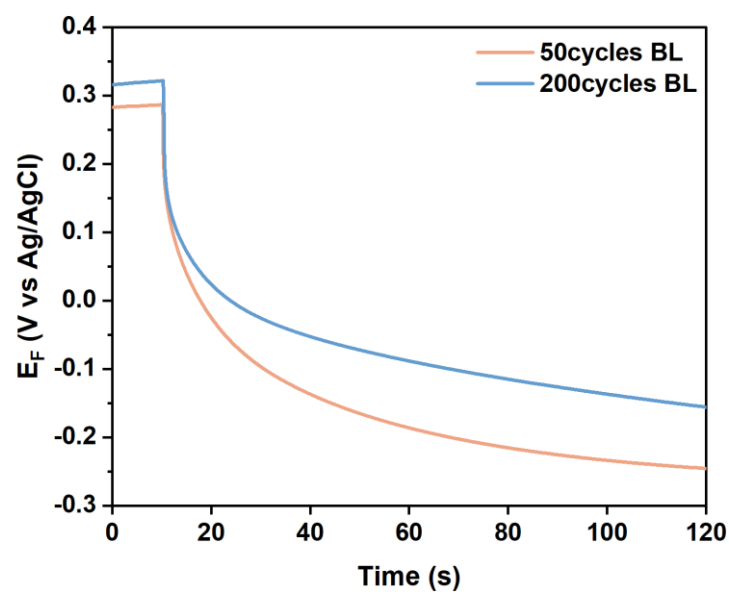

**Figure S8.** Open-circuit voltage decays for DSPECs of 50 cycles BLs (pink) and 200 cycles BLs (blue).

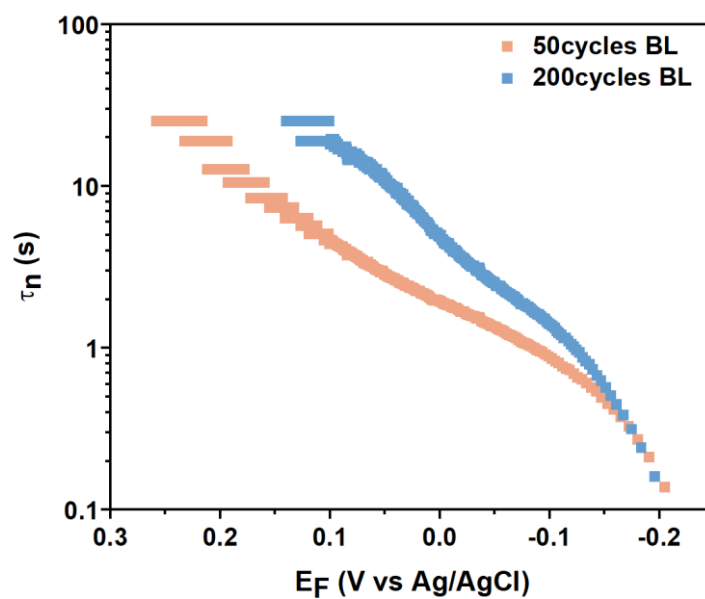

**Figure S9.** Electron lifetime curves for DSPECs of 50 cycles BLs (pink) and 200 cycles BLs (blue).

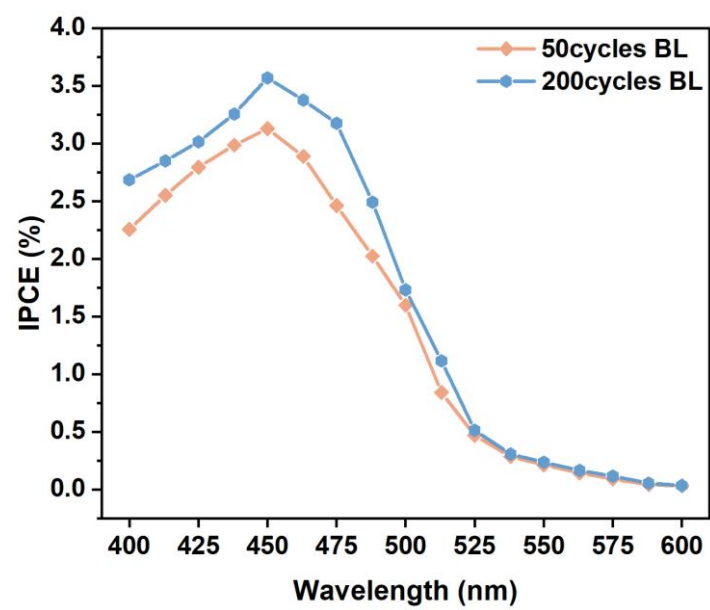

**Figure S10.** IPCE profiles for DSPECs of 50 cycles BLs (pink) and 200 cycles BLs (blue).
